# Supplementary material for: Mapping sub-cellular protein aggregates and lipid inclusions using synchrotron ATR-FTIR microspectroscopy
Source: Royal Society of Chemistry journal article supplement (doi:10.1039/d1an00136a), 2021-01-01
Supplement: d1an00136a1.pdf [file d1an00136a1.pdf]

## ELECTRONIC SUPPLEMENTARY INFORMATION

**Figure S1:** Representative examples of the foot print of the focussed and de-focussed single synchrotron IR beam, as recorded on the  $32 \times 32$  active pixels of the FPA imaging detector.

**Figure S2:** Representative examples of using false-colour FTIR images based on integrated areas under the carbonyl stretching band of esters in lipids ( $\nu(\text{C}=\text{O})$ :  $1755 - 1715 \text{ cm}^{-1}$ ) to reveal the location of cell bodies in healthy (sham) brain tissue. Note that neurons have relatively lower lipid contents than those of the surrounding neuropil tissue. Min-Max scale ranges from 0 to 0.2 in each image. Scale bars =  $10 \mu\text{m}$ .

**Figure S3:** SR-ATR-FTIR maps of protein and lipid distribution acquired from triplicates of individual bacterial cells at  $1 \mu\text{m}$  pixel size, to reveal the location of lipophilic inclusions within bacterial cells. Scale bar =  $2 \mu\text{m}$ .

**Figure S4:** Comparison of the amide I protein images of the same brain cell imaged with single-beam SR-ATR-FTIR-FPA imaging, and SR-ATR-FTIR mapping. **(A)** Bright field optical image of a degenerating cell in ischemic brain tissue. **(B)** False colour functional group image of total protein (amide I band), showing location of degenerating neuron, recorded with single-beam SR-ATR-FTIR-FPA imaging. **(C)** False colour functional group image of total protein (amide I band), showing location of degenerating neuron, recorded with SR- ATR-FTIR mapping. Scale bar =  $5 \mu\text{m}$ .
